# Supplementary material for: Dynamics of salt intrusion in complex estuarine networks; an idealised model applied to the Rhine-Meuse Delta
Source: Copernicus journal article supplement (doi:10.5194/egusphere-2024-2322), 2024-08-15
Supplement: Supplementary file 1 [file egusphere-2024-2322-supplement.pdf]

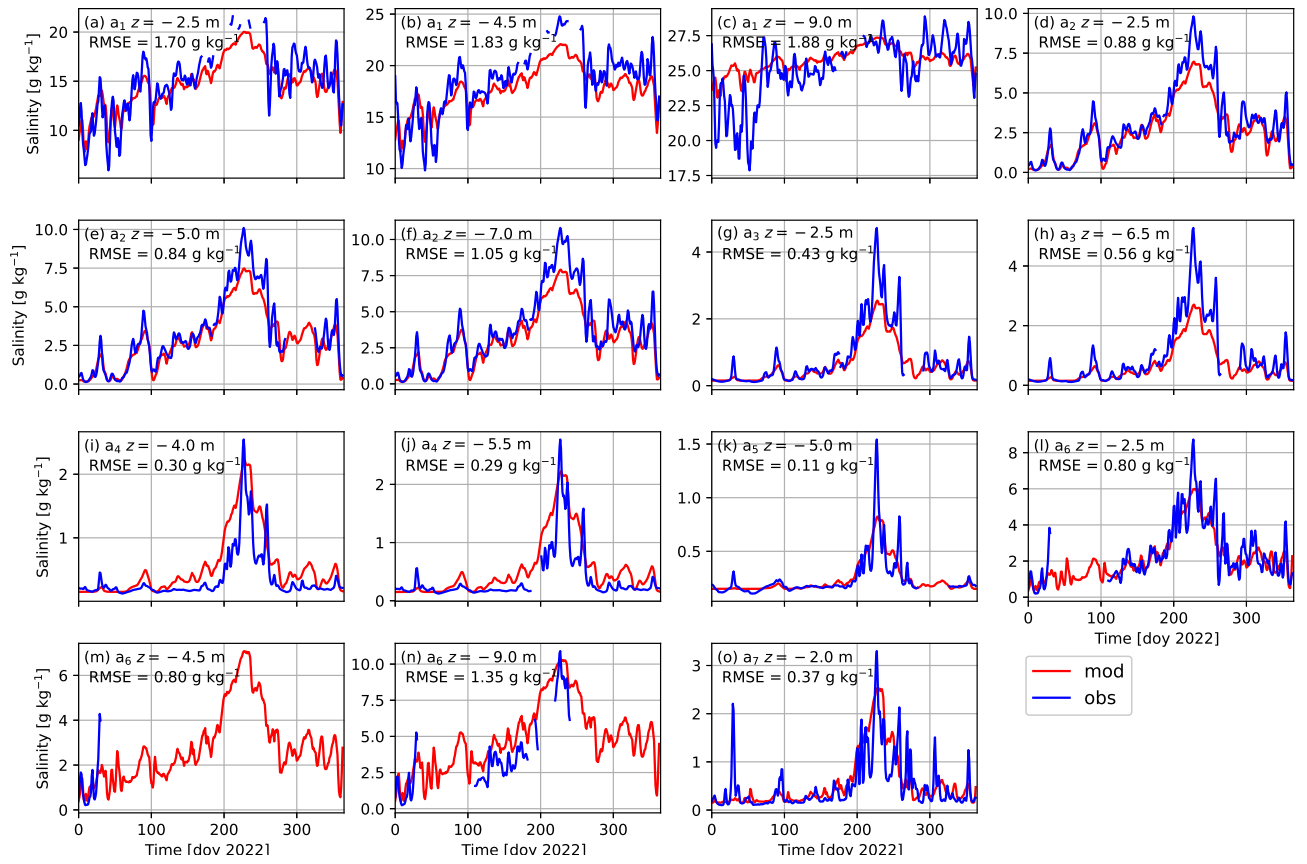

**Figure S1.** Observed (blue) and modelled (red) tidally averaged salinity time series for the year 2022 for different observation stations in the Rhine-Meuse Delta. Locations of the stations are indicated in Fig. 1 in the main text.

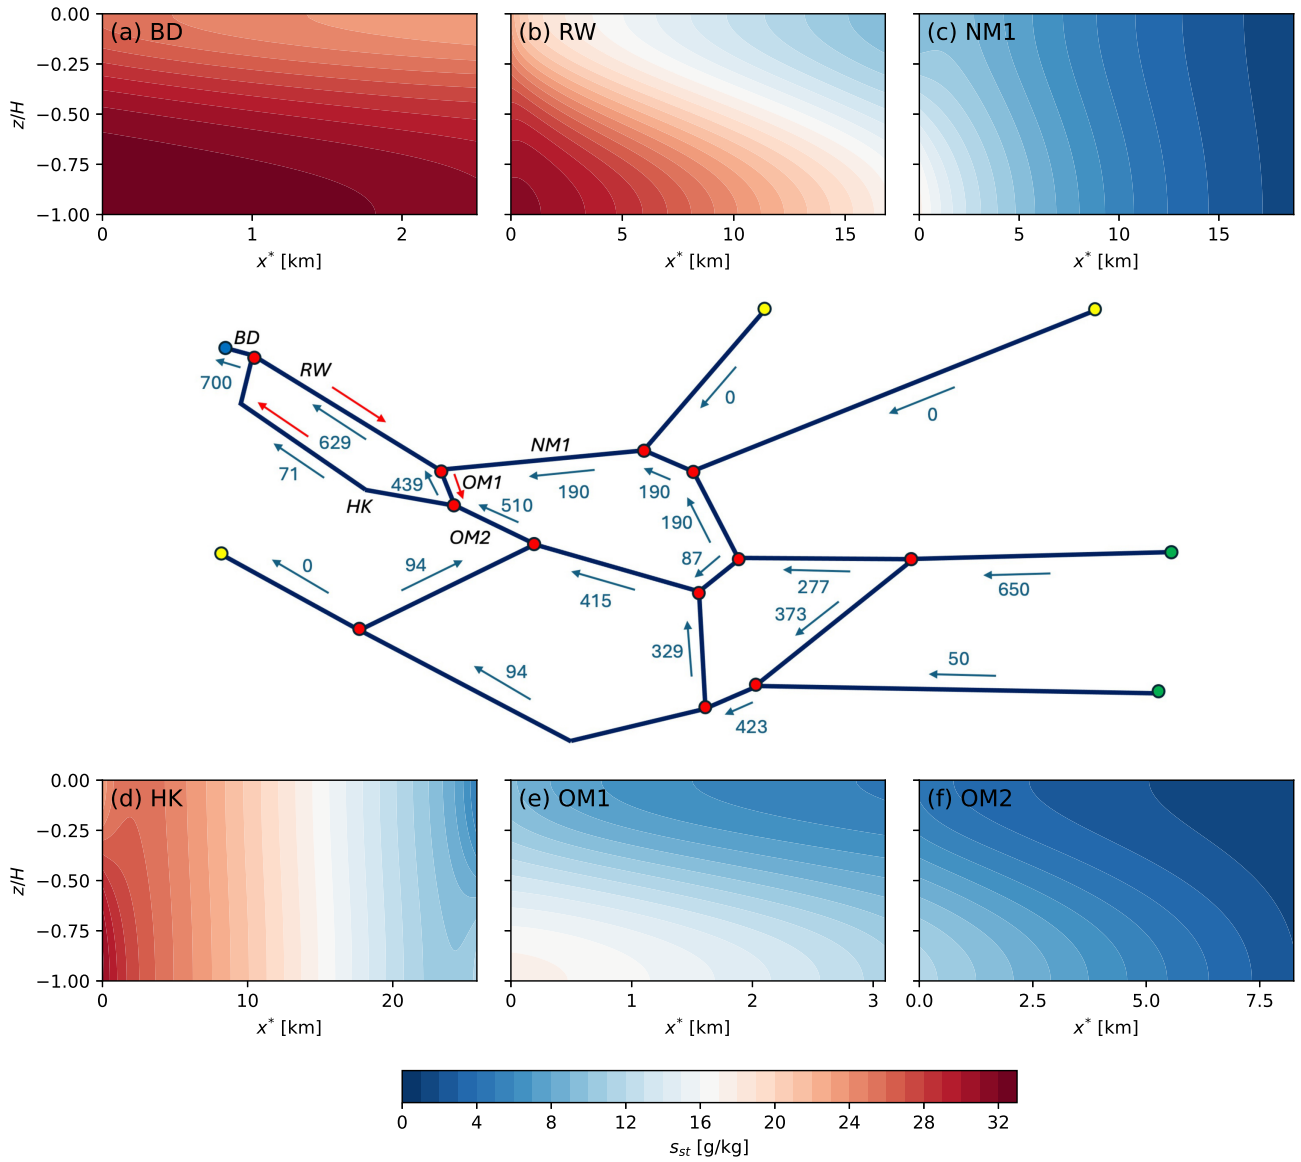

**Figure S2.** Center panel: As Fig. 2a in the main text, but with the discharge distribution in the Rhine-Meuse Delta for low flow conditions. Values are in  $\text{m}^3\text{s}^{-1}$ . The red arrows indicate the direction of net salt transport (overspill). (a)-(f) Subtidal salinities under low flow conditions as a function of  $x^* \equiv -x$ , and  $\frac{z}{H}$  for different channels.

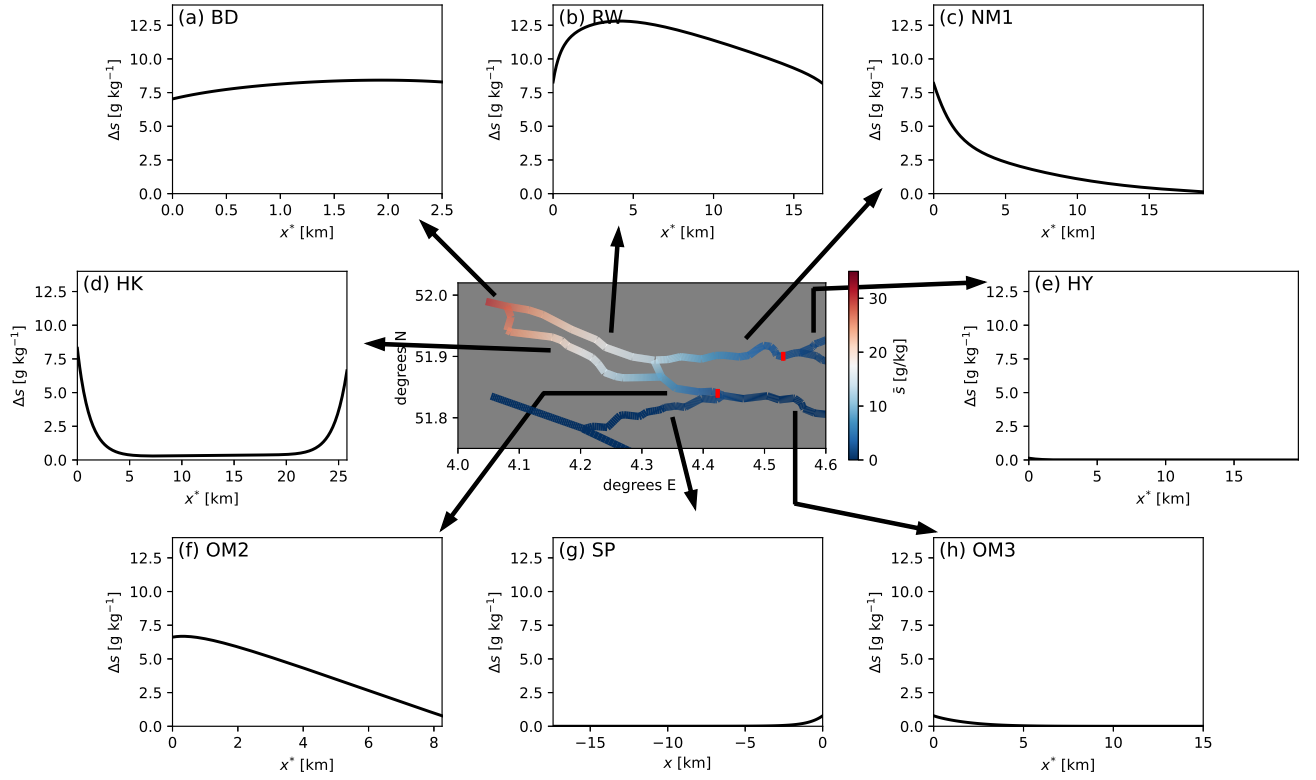

**Figure S3.** Center panel: depth and tidally averaged salinity in the Rhine-Meuse Delta for low discharge conditions. The red lines in this figure indicate the location of the  $2 \text{ g kg}^{-1}$  isohaline. (a)-(h) Surface-bottom subtidal salinity difference, versus  $x$  or  $x^* \equiv -x$  for different channels.

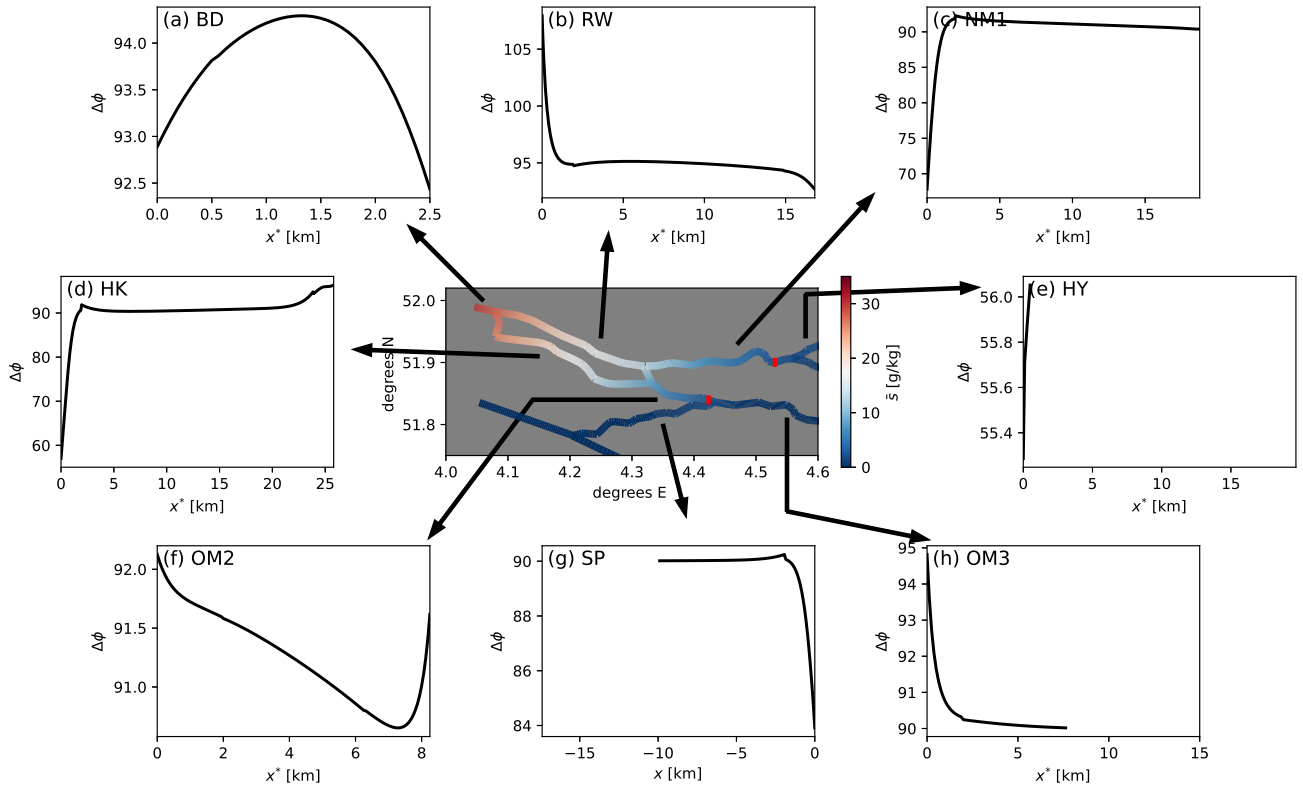

**Figure S4.** Center panel: depth and tidally averaged salinity in the Rhine-Meuse DeltaMD for low discharge conditions. The red lines in this figure indicate the location of the  $2 \text{ g kg}^{-1}$  isohaline. (a)-(h) Phase difference between depth-averaged tidal current and salinity  $\Delta\phi$ , versus  $x$  or  $x^* \equiv -x$  for different channels.

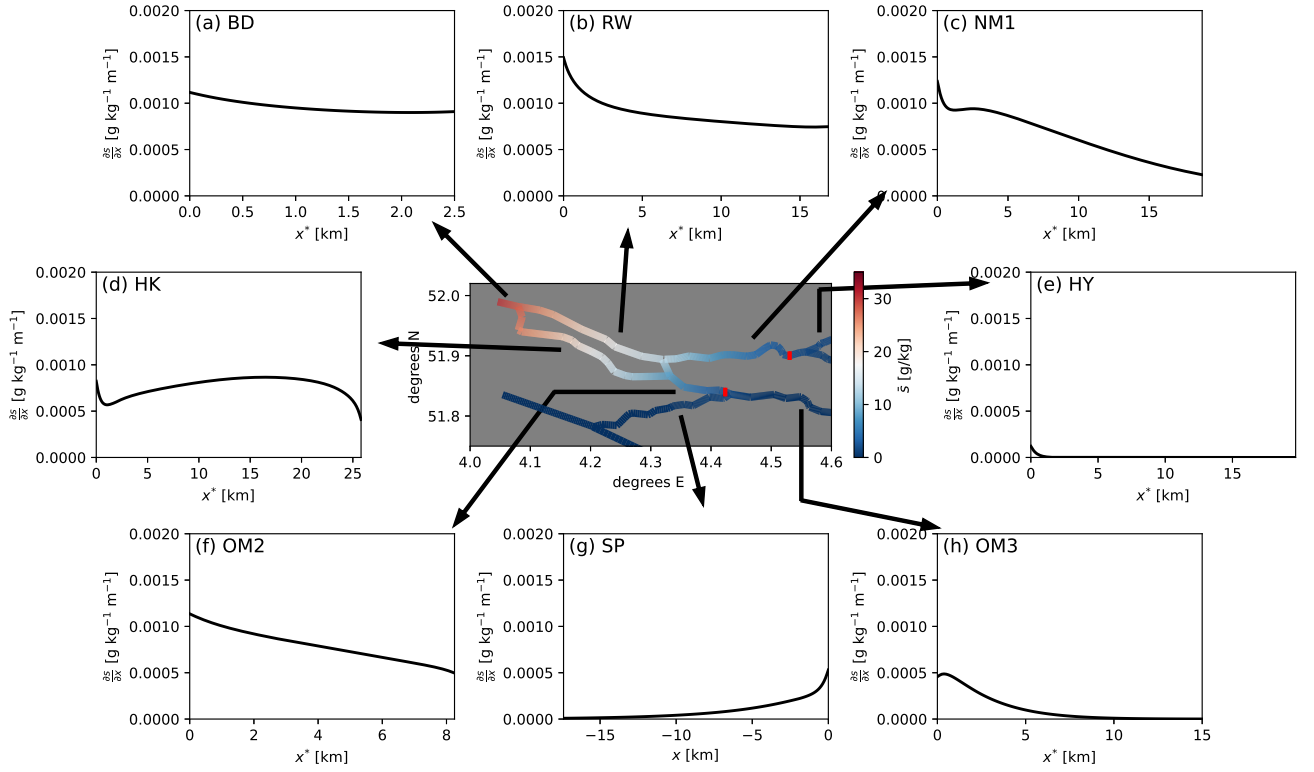

**Figure S5.** Center panel: depth and tidally averaged salinity in the Rhine-Meuse Delta for low discharge conditions. The red lines in this figure indicate the location of the  $2 \text{ g kg}^{-1}$  isohaline. (a)-(h) Horizontal gradient of the subtidal salinity, versus  $x$  or  $x^* \equiv -x$  for different channels.
